# Supplementary material for: Effects of cigarette smoking on blood lipids in Korean men: Cardiovascular and Metabolic Diseases Etiology Research Center cohort
Source: PubMed Central journal article supplement — Korean J Intern Med. 2019 Dec 18;35(2):369–82. doi: 10.3904/kjim.2019.133 (PMC7060992; doi:10.3904/kjim.2019.133), 2019-12-18
Supplement: kjim-2019-133-suppl1.pdf [file kjim-2019-133-suppl1.pdf]

**Supplementary Table 1. Serum triglycerides levels by current smoking status and smoked pack-years (stratified for alcohol drinking status)**

| Smoking status                            | Log TG                |               |                                    |           |                              |         |           |               |         |
|-------------------------------------------|-----------------------|---------------|------------------------------------|-----------|------------------------------|---------|-----------|---------------|---------|
|                                           | Non-drinkers (n = 97) |               | Non-high risk drinkers (n = 1,175) |           | High risk drinkers (n = 660) |         |           |               |         |
|                                           | $\beta$               | 95% CI        | p value                            | $\beta$   | 95% CI                       | p value | $\beta$   | 95% CI        | p value |
| Never-smoker (n = 29)                     | Reference             |               |                                    | Reference |                              |         | Reference |               |         |
| Past light smoker (n = 38) <sup>a</sup>   | 0.07                  | -0.14 to 0.28 | 0.516                              | 0.04      | -0.03 to 0.12                | 0.234   | 0.03      | -0.11 to 0.17 | 0.651   |
| Past heavy smoker (n = 20) <sup>a</sup>   | 0.30                  | 0.04 to 0.56  | 0.026                              | 0.05      | -0.05 to 0.14                | 0.329   | 0.13      | -0.03 to 0.29 | 0.123   |
| Current light smoker (n = 6) <sup>a</sup> | 0.32                  | -0.08 to 0.71 | 0.113                              | 0.14      | 0.05 to 0.22                 | 0.002   | 0.14      | 0.001 to 0.28 | 0.048   |
| Current heavy smoker (n = 4) <sup>a</sup> | -0.01                 | -0.44 to 0.43 | 0.977                              | 0.11      | 0.02 to 0.21                 | 0.017   | 0.27      | 0.13 to 0.41  | < 0.001 |

Values are the results from multiple linear regression models adjusted for age, body mass index, systolic blood pressure, fasting serum glucose, physical activity and energy, carbohydrate and fat intake.

TG, triglyceride; CI, confidence interval.

<sup>a</sup>Past/current light smokers are past/current smokers with less than 20 pack-year, past/current heavy smokers are past/current smokers with more than 20 pack-year.
