# Supplementary material for: Effects of cigarette smoking on blood lipids in Korean men: Cardiovascular and Metabolic Diseases Etiology Research Center cohort
Source: PubMed Central journal article supplement — Korean J Intern Med. 2019 Dec 18;35(2):369–82. doi: 10.3904/kjim.2019.133 (PMC7060992; doi:10.3904/kjim.2019.133), 2019-12-18
Supplement: kjim-2019-133-suppl2.pdf [file kjim-2019-133-suppl2.pdf]

**Supplementary Table 2. Serum lipid levels by current smoking status and smoked pack-years (women only)**

| Smoking status                              | TC, mg/dL |                 |         | HDL-C, mg/dL |                |         | LDL-C, mg/dL |                 |         | Log-TG  |               |         |
|---------------------------------------------|-----------|-----------------|---------|--------------|----------------|---------|--------------|-----------------|---------|---------|---------------|---------|
|                                             | $\beta$   | 95% CI          | p value | $\beta$      | 95% CI         | p value | $\beta$      | 95% CI          | p value | $\beta$ | 95% CI        | p value |
| Never-smoker (n = 3,529)                    |           | Reference       |         |              | Reference      |         |              | Reference       |         |         | Reference     |         |
| Past light smoker (n = 114) <sup>a</sup>    | 0.26      | -5.83 to 6.35   | 0.934   | 4.21         | 1.72 to 6.70   | 0.001   | -3.79        | -9.18 to 1.60   | 0.168   | -0.01   | -0.09 to 0.07 | 0.802   |
| Past heavy smoker (n = 6) <sup>a</sup>      | 13.17     | -12.65 to 38.99 | 0.317   | -3.59        | -14.16 to 6.98 | 0.505   | 16.71        | -6.16 to 39.58  | 0.152   | 0.07    | -0.28 to 0.41 | 0.692   |
| Current light smoker (n = 103) <sup>a</sup> | 5.87      | -0.60 to 12.34  | 0.075   | -0.53        | -3.18 to 2.12  | 0.693   | 2.26         | -3.47 to 7.99   | 0.440   | 0.16    | 0.07 to 0.24  | < 0.001 |
| Current heavy smoker (n = 5) <sup>a</sup>   | 10.15     | -18.12 to 38.41 | 0.482   | 5.13         | -6.44 to 16.71 | 0.384   | 4.15         | -20.88 to 29.18 | 0.745   | 0.09    | -0.29 to 0.47 | 0.640   |
| <i>p</i> for interaction <sup>b</sup>       |           | 0.472           |         |              | 0.028          |         |              | 0.180           |         |         | 0.616         |         |

Values are the results from multiple linear regression models adjusted for age, body mass index, alcohol intake, systolic blood pressure, fasting serum glucose, physical activity and energy, carbohydrate and fat intake.

TC, total cholesterol; HDL-C, high-density lipoprotein cholesterol; LDL-C, low-density lipoprotein cholesterol; TG, triglyceride; CI, confidence interval.

<sup>a</sup>Past/current light smokers are past/current smokers with less than 20 pack-year, past/current heavy smokers are past/current smokers with more than 20 pack-year.

<sup>b</sup>A *p* value for interaction of gender with current smoking status.
